# Supplementary material for: Peripheral optogenetic stimulation induces whisker movement and sensory perception in head-fixed mice
Source: eLife. 2016 Jun 8;5:e14140. doi: 10.7554/eLife.14140 (PMC4940159; doi:10.7554/eLife.14140)
Supplement: Figure 2—source data 1. — DOI: http://dx.doi.org/10.7554/eLife.14140.007 [file elife-14140-fig2-data1.xlsx]

## Sheet: Sheet1
Figure 2 - source data 1
Related to Fig 2B
Light Intensity (mW)	Angle change (Degrees)		Whisker Movement Latency
	Mean	SEM	Mean	SEM
0.76234	1.03942	0.06728	18.2444	5.43579
2.3425	2.49658	0.73963	16.9129	2.94886
3.4625	3.46019	0.95524	10.6287	1.10052
4.4625	5.00344	0.90368	10.1583	0.66829
5.29	6.90382	1.40002	12.9343	0.51852
6.28	6.84164	1.67769	10.3147	0.54887
7.265	8.94541	1.95653	12.8364	0.30856
8.34333	9.72136	1.82228	12.5855	0.68883
9.54	10.5591	1.89308	12.5897	0.7797
10.12	11.4347	1.16942	11.5385	1.74057
