# Supplementary material for: Peripheral optogenetic stimulation induces whisker movement and sensory perception in head-fixed mice
Source: eLife. 2016 Jun 8;5:e14140. doi: 10.7554/eLife.14140 (PMC4940159; doi:10.7554/eLife.14140)
Supplement: Figure 2—source data 2. — DOI: http://dx.doi.org/10.7554/eLife.14140.008 [file elife-14140-fig2-data2.xlsx]

## Sheet: Sheet1
Figure 2 - source data 2
Related to Fig 2C
Stimulus Duration (ms)	Angle change (Degrees)
	Mean	SEM
5	2.2632	0.70036
10	3.16074	0.99531
15	4.16586	0.99155
20	5.9261	0.9366
25	6.98361	1.73078
30	7.80551	1.65454
35	7.70601	1.76303
40	8.68041	2.12777
45	8.74072	2.21573
50	8.45695	1.91459
55	8.94024	2.25605
60	9.70328	1.92442
150	9.27074	2.15277
250	9.36552	1.61092
350	9.3559	1.58221
450	9.44081	1.6558
550	9.39712	1.74584
650	9.79567	1.60198
750	9.97567	1.74145
850	10.0185	1.68113
950	9.5874	1.74238
1050	9.39751	1.3028
1150	9.64072	1.09191
