# Supplementary material for: Peripheral optogenetic stimulation induces whisker movement and sensory perception in head-fixed mice
Source: eLife. 2016 Jun 8;5:e14140. doi: 10.7554/eLife.14140 (PMC4940159; doi:10.7554/eLife.14140)
Supplement: Figure 2—source data 3. — DOI: http://dx.doi.org/10.7554/eLife.14140.009 [file elife-14140-fig2-data3.xlsx]

## Sheet: Sheet1
Figure 2 - source data 3
Related to Fig 2D
Stimulus Frequency (Hz)	Amplitude Ratio (a2/a1)		Amplitude Ratio (an/a1)
	Mean	SEM	Mean	SEM
1	1	0	1	0
2	0.78083	0.12577	0.78083	0.12577
3	0.77995	0.06103	0.74982	0.09539
5	0.81125	0.04317	0.7426	0.10858
6	0.78603	0.04137	0.65205	0.07428
7	--	--	--	--
8	0.79096	0.03526	0.61181	0.10725
9	--	--	--	--
10	0.74572	0.06764	0.43912	0.04033
12	0.71919	0.0691	0.44203	0.04326
14	0.71091	0.03516	0.41084	0.0263
16	0.6482	0.03735	0.40972	0.04815
18	0.59582	0.07101	0.43668	0.0182
20	0.63126	0.06697	0.41685	0.06471
22	0.59229	0.08915	0.41685	0.06471
26	0.62224	0.04564	0.40102	0.06008
28	0.65898	0.03763	0.41171	0.03541
