# Supplementary material for: Peripheral optogenetic stimulation induces whisker movement and sensory perception in head-fixed mice
Source: eLife. 2016 Jun 8;5:e14140. doi: 10.7554/eLife.14140 (PMC4940159; doi:10.7554/eLife.14140)
Supplement: Figure 3—source data 1. — DOI: http://dx.doi.org/10.7554/eLife.14140.011 [file elife-14140-fig3-data1.xlsx]

## Sheet: Peak LFP, Spike Count vs. Dur. 
Figure 3 - source data 1
Related to Fig 3D
Stimulus Duration (ms)	Spike Count (Normalized)	SEM	LFP Peak (Normalized)	SEM
1	0	0	0	0
5	0.43522	0.25962	0.34649	0.18379
10	0.47172	0.27641	0.71847	0.21612
20	0.79823	0.20146	0.86034	0.21396
40	0.88465	0.0366	0.9862	0.10847
100	1	0.06849	1	0.05948
