# Supplementary material for: Peripheral optogenetic stimulation induces whisker movement and sensory perception in head-fixed mice
Source: eLife. 2016 Jun 8;5:e14140. doi: 10.7554/eLife.14140 (PMC4940159; doi:10.7554/eLife.14140)
Supplement: Figure 4—source data 1. — DOI: http://dx.doi.org/10.7554/eLife.14140.013 [file elife-14140-fig4-data1.xlsx]

## Sheet: Sheet1
Figure 4 - source data 1
Related to Figure 4B
Session No.	Hit Rate		FA Rate		d'
	Mean	SEM	Mean	SEM	Mean	SEM
1	0.72008	0.07947	0.44088	0.08569	0.70829	0.13365
2	0.85558	0.00479	0.25427	0.04735	1.75669	0.1634
3	0.77633	0.0468	0.16787	0.07225	1.91905	0.14226
4	0.89944	0.0118	0.25138	0.04257	2.02863	0.16506
5	0.92046	0.01949	0.24132	0.06697	2.21838	0.3583
6	0.8333	0.04731	0.1998	0.04504	1.91618	0.30328
7	0.83695	0.01413	0.17833	0.0381	1.93078	0.18906
8	0.88609	0.03947	0.20278	0.04466	2.29516	0.37969
