# Supplementary material for: Peripheral optogenetic stimulation induces whisker movement and sensory perception in head-fixed mice
Source: eLife. 2016 Jun 8;5:e14140. doi: 10.7554/eLife.14140 (PMC4940159; doi:10.7554/eLife.14140)
Supplement: Figure 4—source data 2. — DOI: http://dx.doi.org/10.7554/eLife.14140.014 [file elife-14140-fig4-data2.xlsx]

## Sheet: Sheet1
Figure 4 - source data 2
Related to Figure 4C
Stimulation Duration (ms)	Lick Probability		Time to first lick (ms)		d'
	Mean	SEM	Mean	SEM	Mean	SEM
1	0.3316	0.03665	615.937	37.5409	0.70829	0.13365
5	0.7108	0.01456	387.134	19.8994	1.75669	0.1634
10	0.7659	0.04731	379.332	20.2971	1.91905	0.14226
20	0.83147	0.0301	422.1	23.9495	2.02863	0.16506
40	0.88271	0.00403	373.514	17.9977	2.21838	0.3583
100	0.87099	0.00881	358.653	15.8779	1.91618	0.30328
