# Supplementary figures and images for: Peripheral optogenetic stimulation induces whisker movement and sensory perception in head-fixed mice
Source: eLife journal article supplement (doi:10.7554/elife.14140), 2016-06-08

**A** Emx1-Cre;Ai27D

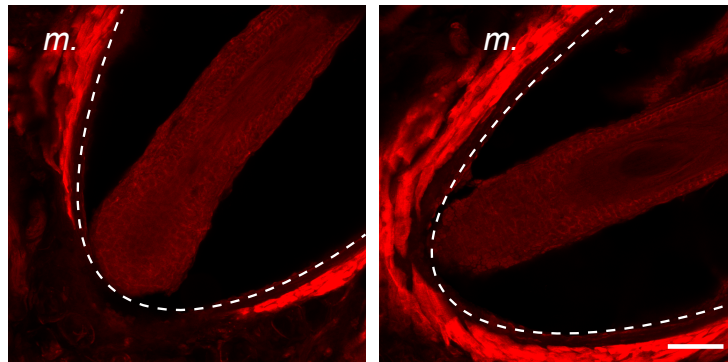

**B** PV-Cre;Ai27D

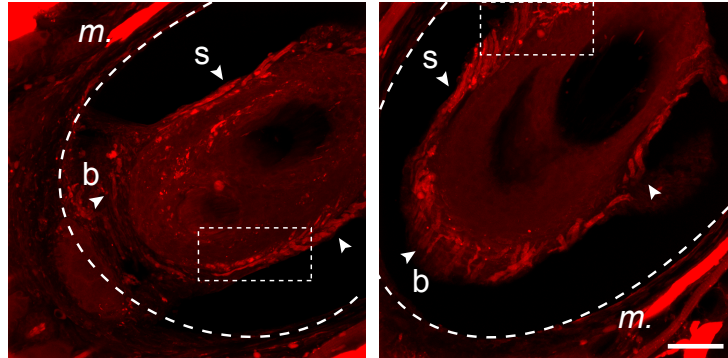

Single plane from boxed region

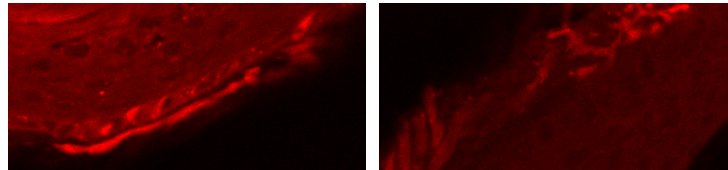

Supplement: supp [file elife-14140-supp-v1.zip]

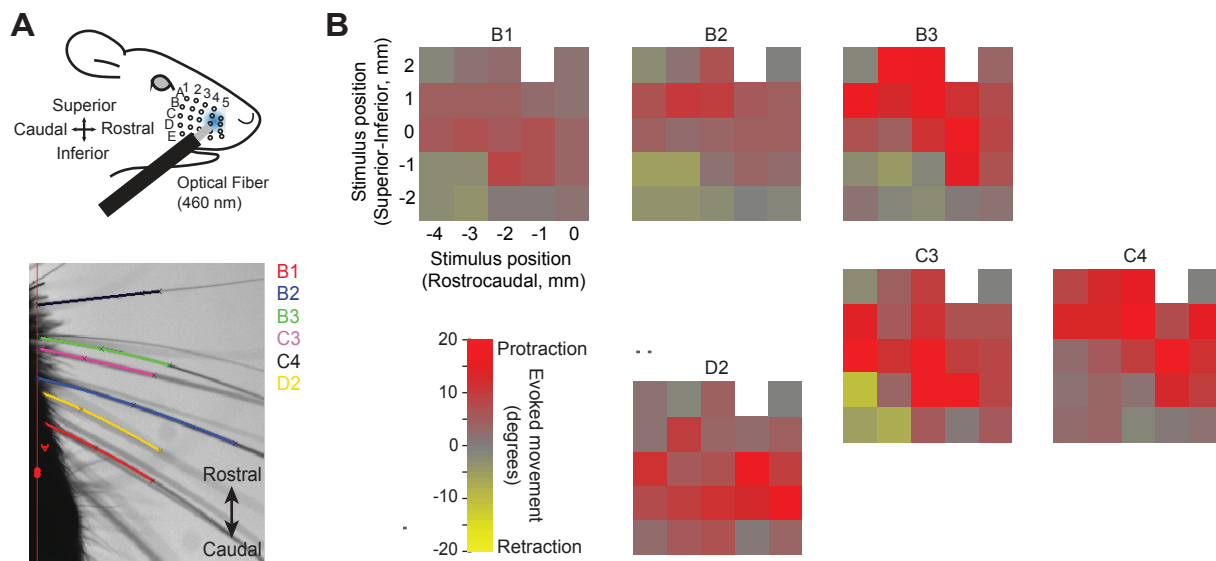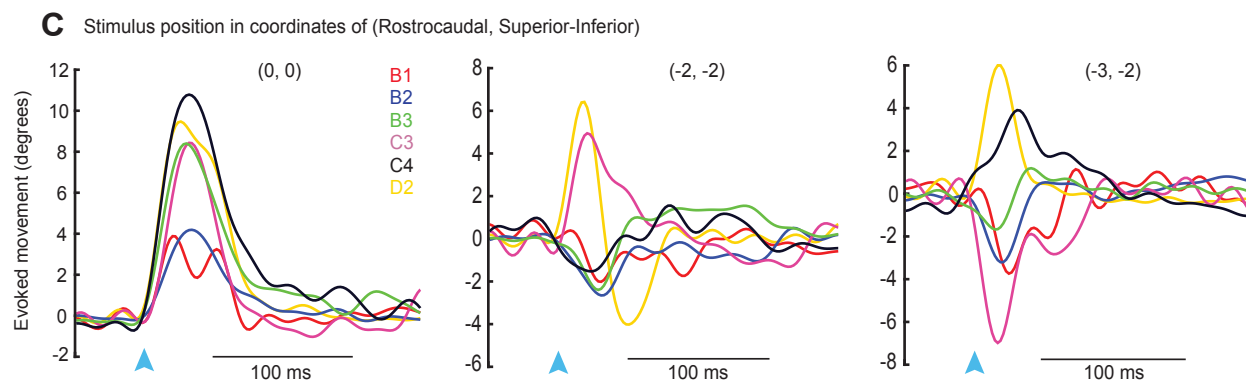

Supplement: supp [file elife-14140-supp-v1.zip]
